# Supplementary material for: Innate Immune Training of Granulopoiesis Promotes Anti-tumor Activity
Source: PubMed Central journal article supplement — Cell. 2020 Oct 29;183(3):771–785.e12. doi: 10.1016/j.cell.2020.09.058 (PMC7599076; doi:10.1016/j.cell.2020.09.058), 2020-10-29
Supplement: mmc1.pdf [file mmc1.pdf]

## Supplemental Information

### Innate Immune Training of Granulopoiesis

#### Promotes Anti-tumor Activity

Lydia Kalafati, Ioannis Kourtzelis, Jonas Schulte-Schrepping, Xiaofei Li, Aikaterini Hatzioannou, Tatyana Grinenko, Eman Hagag, Anupam Sinha, Canan Has, Sevina Dietz, Antonio Miguel de Jesus Domingues, Marina Nati, Sundary Sormendi, Ales Neuwirth, Antonios Chatzigeorgiou, Athanasios Ziogas, Mathias Lesche, Andreas Dahl, Ian Henry, Pallavi Subramanian, Ben Wielockx, Peter Murray, Peter Mirtschink, Kyoung-Jin Chung, Joachim L. Schultze, Mihai G. Netea, George Hajishengallis, Panayotis Verginis, Ioannis Mitroulis, and Triantafyllos Chavakis

## SUPPLEMENTARY TABLES

### **Table S1 (Related to Figure 2B). GSEA results.**

Results of GSEA on RNA sequencing from tumor-associated neutrophils (TAN) derived from mice that were trained for 7 days with  $\beta$ -glucan or injected with PBS as control and were then inoculated with B16-F10 melanoma cells for 14 days, using a gene set of 92 genes, implicated as playing a role in the functionality of TAN-1 (derived from Shaul et al., 2016, specifically Table S4 therein; as described in the STAR methods). 86 genes out of the 92 gene set are expressed in our study and their position within our ranked list is shown. In addition, RANK METRIC SCORE refers to score used to position the gene in the ranked list, RUNNING ES refers to the enrichment score at this point in the ranked list of genes, and CORE ENRICHMENT describes whether the gene contributed to the leading-edge subset within the gene-set (i.e. the subset of genes that contributes most to the enrichment result).

### **Table S2 (Related to Figure 2D). GSEA results.**

Results of GSEA on RNA sequencing from TAN derived from mice that were trained for 7 days with  $\beta$ -glucan or injected with PBS as control and were then inoculated with B16-F10 melanoma cells for 14 days, using the MSigDB Hallmark Gene Set. NAME is the gene set name; SIZE is the number of genes in the gene set after filtering out those genes not in the expression dataset; ES is the enrichment score for the gene set; NES is the normalized enrichment score that accounts for size differences in gene sets; NOM p-val is the nominal p-value of ES significance based on permutation test; FDR q-val is the False Discovery Rate; FWER p-val is the family-wise error rate; RANK AT MAX is the position in the ranked list at which the maximum running enrichment score occurred.

### **Table S3 (Related to Figure 4). The neutrophil bias of GMP upon $\beta$ -glucan-induced trained immunity.**

WT mice were treated with  $\beta$ -glucan or PBS and after 7 days BM GMP ( $\text{Lin}^- \text{c-Kit}^+ \text{Sca1}^- \text{CD16/32}^+ \text{CD34}^+$ ) were sorted and RNA sequencing analysis was performed. The neutrophil bias of GMP was analyzed based on GSEA using the MSigDB Immunologic Signatures Gene Set. Datasets that include genes that are upregulated in neutrophils compared to other cell populations are shown in green and datasets with genes downregulated in neutrophils compared to other myeloid cell populations are shown in blue. Level of statistical significance was set at  $\text{FDR} = 0.05$ . NAME is the gene set name; SIZE is the number of genes in the gene set after filtering out those genes not in the expression dataset; ES is the enrichment score for the gene set; NES is the normalized enrichment score that accounts for size differences in gene sets; NOM p-val is the nominal p-value of ES significance based on permutation test; FDR q-val is the False Discovery Rate; logFDR is the log value of FDR; FWER p-val is the family-wise error rate; RANK AT MAX is the position in the ranked list at which the maximum running enrichment score occurred.

### **Table S4 (Related to Figure 4G, H). GSEA results**

Results of GSEA on RNA sequencing from GMP derived from mice that were trained for 7 days with  $\beta$ -glucan or injected with PBS as control using the MSigDB Hallmark

Gene Set. NAME is the gene set name; SIZE is the number of genes in the gene set after filtering out those genes not in the expression dataset; ES is the enrichment score for the gene set; NES is the normalized enrichment score that accounts for size differences in gene sets; NOM p-val is the nominal p-value of ES significance based on permutation test; FDR q-val is the False Discovery Rate; FWER p-val is the family-wise error rate; RANK AT MAX is the position in the ranked list at which the maximum running enrichment score occurred.

**Table S5 (Related to STAR Methods). Gene-specific primers for the ‘trained TAN1-like signature’**

Gene-specific primers for the ‘trained TAN1-like signature’ used for quantitative real-time PCR analysis. The ‘trained TAN1-like signature’ is defined in ‘STAR Methods’ under ‘RNA isolation and real time PCR’.

Table S1

|    | PROBE               | RANK IN GENE LIST | RANK METRIC SCORE | RUNNING ES | CORE ENRICHMENT |
|----|---------------------|-------------------|-------------------|------------|-----------------|
| 1  | ENSMUSG00000020440  | 15                | 6.721             | 0.0686     | Yes             |
| 2  | ENSMUSG00000064373  | 44                | 5.321             | 0.1216     | Yes             |
| 3  | ENSMUSG00000021361  | 90                | 4.092             | 0.1604     | Yes             |
| 4  | ENSMUSG00000063856  | 105               | 3.820             | 0.1990     | Yes             |
| 5  | ENSMUSG00000036887  | 136               | 3.528             | 0.2332     | Yes             |
| 6  | ENSMUSG00000040212  | 163               | 3.222             | 0.2646     | Yes             |
| 7  | ENSMUSG00000023078  | 177               | 3.104             | 0.2957     | Yes             |
| 8  | ENSMUSG00000040950  | 179               | 3.078             | 0.3276     | Yes             |
| 9  | ENSMUSG00000024679  | 180               | 3.069             | 0.3595     | Yes             |
| 10 | ENSMUSG00000024570  | 243               | 2.703             | 0.3825     | Yes             |
| 11 | ENSMUSG00000024965  | 268               | 2.607             | 0.4077     | Yes             |
| 12 | ENSMUSG00000073421  | 322               | 2.446             | 0.4288     | Yes             |
| 13 | ENSMUSG00000036896  | 358               | 2.363             | 0.4505     | Yes             |
| 14 | ENSMUSG00000002741  | 443               | 2.079             | 0.4653     | Yes             |
| 15 | ENSMUSG00000030744  | 516               | 1.883             | 0.4790     | Yes             |
| 16 | ENSMUSG00000069516  | 519               | 1.878             | 0.4984     | Yes             |
| 17 | ENSMUSG00000032436  | 585               | 1.778             | 0.5116     | Yes             |
| 18 | ENSMUSG00000026728  | 681               | 1.605             | 0.5206     | Yes             |
| 19 | ENSMUSG00000031708  | 706               | 1.569             | 0.5349     | Yes             |
| 20 | ENSMUSG00000044533  | 809               | 1.442             | 0.5417     | Yes             |
| 21 | ENSMUSG00000002957  | 928               | 1.346             | 0.5461     | Yes             |
| 22 | ENSMUSG00000021190  | 998               | 1.291             | 0.5539     | Yes             |
| 23 | ENSMUSG00000002981  | 1004              | 1.284             | 0.5669     | Yes             |
| 24 | ENSMUSG00000027466  | 1029              | 1.249             | 0.5779     | Yes             |
| 25 | ENSMUSG000000057191 | 1082              | 1.201             | 0.5862     | Yes             |
| 26 | ENSMUSG00000061477  | 1100              | 1.182             | 0.5971     | Yes             |
| 27 | ENSMUSG00000028063  | 1221              | 1.078             | 0.5985     | Yes             |
| 28 | ENSMUSG00000030707  | 1253              | 1.053             | 0.6070     | Yes             |
| 29 | ENSMUSG00000030802  | 1322              | 1.008             | 0.6119     | Yes             |
| 30 | ENSMUSG00000032369  | 1350              | 0.987             | 0.6200     | Yes             |
| 31 | ENSMUSG00000060601  | 1477              | 0.921             | 0.6194     | Yes             |
| 32 | ENSMUSG00000021094  | 1520              | 0.883             | 0.6252     | Yes             |
| 33 | ENSMUSG00000056076  | 1590              | 0.851             | 0.6284     | Yes             |
| 34 | ENSMUSG00000035199  | 1656              | 0.818             | 0.6317     | Yes             |
| 35 | ENSMUSG00000021917  | 1666              | 0.814             | 0.6394     | Yes             |
| 36 | ENSMUSG00000020432  | 1671              | 0.809             | 0.6475     | Yes             |
| 37 | ENSMUSG00000063316  | 1676              | 0.808             | 0.6555     | Yes             |
| 38 | ENSMUSG00000036908  | 1678              | 0.806             | 0.6638     | Yes             |
| 39 | ENSMUSG00000037370  | 1709              | 0.790             | 0.6696     | Yes             |
| 40 | ENSMUSG00000018927  | 2005              | 0.680             | 0.6528     | No              |
| 41 | ENSMUSG00000026750  | 2219              | 0.594             | 0.6418     | No              |
| 42 | ENSMUSG0000003032   | 2386              | 0.536             | 0.6339     | No              |
| 43 | ENSMUSG00000033220  | 2519              | 0.492             | 0.6283     | No              |
| 44 | ENSMUSG00000026177  | 2726              | 0.439             | 0.6163     | No              |
| 45 | ENSMUSG00000031805  | 2735              | 0.438             | 0.6202     | No              |
| 46 | ENSMUSG00000001056  | 2862              | 0.409             | 0.6142     | No              |
| 47 | ENSMUSG00000029470  | 2930              | 0.390             | 0.6129     | No              |
| 48 | ENSMUSG00000034786  | 3142              | 0.337             | 0.5993     | No              |
| 49 | ENSMUSG00000007564  | 3340              | 0.293             | 0.5864     | No              |
| 50 | ENSMUSG00000016319  | 3363              | 0.287             | 0.5876     | No              |
| 51 | ENSMUSG00000051695  | 3574              | 0.249             | 0.5732     | No              |
| 52 | ENSMUSG00000035493  | 3588              | 0.247             | 0.5747     | No              |
| 53 | ENSMUSG00000089832  | 3641              | 0.239             | 0.5730     | No              |
| 54 | ENSMUSG00000060743  | 3721              | 0.227             | 0.5690     | No              |
| 55 | ENSMUSG00000067212  | 3795              | 0.214             | 0.5653     | No              |

|    |                    |       |        |        |    |
|----|--------------------|-------|--------|--------|----|
| 56 | ENSMUSG00000075705 | 3930  | 0.193  | 0.5565 | No |
| 57 | ENSMUSG00000023067 | 4147  | 0.163  | 0.5407 | No |
| 58 | ENSMUSG00000029528 | 4349  | 0.140  | 0.5259 | No |
| 59 | ENSMUSG00000025491 | 4386  | 0.136  | 0.5244 | No |
| 60 | ENSMUSG00000017057 | 4628  | 0.112  | 0.5061 | No |
| 61 | ENSMUSG00000022831 | 4707  | 0.103  | 0.5008 | No |
| 62 | ENSMUSG00000015714 | 4933  | 0.078  | 0.4834 | No |
| 63 | ENSMUSG00000004934 | 4989  | 0.072  | 0.4797 | No |
| 64 | ENSMUSG00000022090 | 5048  | 0.065  | 0.4757 | No |
| 65 | ENSMUSG00000037731 | 5197  | 0.046  | 0.4642 | No |
| 66 | ENSMUSG00000026158 | 6669  | 0.000  | 0.3453 | No |
| 67 | ENSMUSG00000032324 | 7306  | -0.038 | 0.2943 | No |
| 68 | ENSMUSG00000055413 | 7313  | -0.039 | 0.2942 | No |
| 69 | ENSMUSG00000025351 | 7499  | -0.058 | 0.2799 | No |
| 70 | ENSMUSG00000029723 | 7639  | -0.074 | 0.2694 | No |
| 71 | ENSMUSG00000029621 | 8670  | -0.191 | 0.1881 | No |
| 72 | ENSMUSG00000036620 | 9418  | -0.316 | 0.1310 | No |
| 73 | ENSMUSG00000027333 | 9443  | -0.319 | 0.1324 | No |
| 74 | ENSMUSG00000028494 | 9488  | -0.327 | 0.1322 | No |
| 75 | ENSMUSG00000029064 | 9644  | -0.362 | 0.1234 | No |
| 76 | ENSMUSG00000052423 | 9667  | -0.368 | 0.1255 | No |
| 77 | ENSMUSG00000021453 | 9761  | -0.394 | 0.1220 | No |
| 78 | ENSMUSG00000021134 | 9965  | -0.446 | 0.1103 | No |
| 79 | ENSMUSG00000038467 | 9998  | -0.454 | 0.1124 | No |
| 80 | ENSMUSG00000021998 | 10131 | -0.490 | 0.1068 | No |
| 81 | ENSMUSG00000034855 | 10876 | -0.797 | 0.0549 | No |
| 82 | ENSMUSG00000054808 | 10919 | -0.823 | 0.0601 | No |
| 83 | ENSMUSG00000028249 | 10997 | -0.867 | 0.0629 | No |
| 84 | ENSMUSG00000020946 | 11396 | -1.222 | 0.0434 | No |
| 85 | ENSMUSG00000031207 | 11546 | -1.427 | 0.0461 | No |
| 86 | ENSMUSG00000021196 | 11986 | -2.618 | 0.0378 | No |

Table S2

|    | NAME                                       | SIZE | ES   | NES  | NOM p-val | FDR q-val | FWER p-val | RANK AT MAX | LEADING EDGE                   |
|----|--------------------------------------------|------|------|------|-----------|-----------|------------|-------------|--------------------------------|
| 1  | HALLMARK_XENOBIOTIC_METABOLISM             | 153  | 0.57 | 1,89 | 0.000     | 0.000     | 0.000      | 2585        | tags=36%, list=21%, signal=45% |
| 2  | HALLMARK_COAGULATION                       | 103  | 0.57 | 1,74 | 0.000     | 0.006     | 0.006      | 1973        | tags=34%, list=16%, signal=40% |
| 3  | HALLMARK_COMPLEMENT                        | 150  | 0.51 | 1,66 | 0.000     | 0.015     | 0.021      | 1973        | tags=28%, list=16%, signal=33% |
| 4  | HALLMARK_ALLOGRAFT_REJECTION               | 160  | 0.49 | 1,63 | 0.000     | 0.016     | 0.029      | 2067        | tags=28%, list=17%, signal=33% |
| 5  | HALLMARK_EPITHELIAL_MESENCHYMAL_TRANSITION | 143  | 0.46 | 1,50 | 0.004     | 0.055     | 0.129      | 2024        | tags=29%, list=16%, signal=34% |
| 6  | HALLMARK_ANGIOGENESIS                      | 30   | 0.59 | 1,49 | 0.033     | 0.048     | 0.133      | 2070        | tags=40%, list=17%, signal=48% |
| 7  | HALLMARK_REACTIVE_OXIGEN_SPECIES_PATHWAY   | 42   | 0.54 | 1,45 | 0.044     | 0.061     | 0.202      | 2638        | tags=40%, list=21%, signal=51% |
| 8  | HALLMARK_BILE_ACID_METABOLISM              | 83   | 0.48 | 1,44 | 0.018     | 0.056     | 0.212      | 2170        | tags=35%, list=17%, signal=42% |
| 9  | HALLMARK_OXIDATIVE_PHOSPHORYLATION         | 188  | 0.41 | 1,41 | 0.005     | 0.069     | 0.269      | 2565        | tags=38%, list=21%, signal=47% |
| 10 | HALLMARK_FATTY_ACID_METABOLISM             | 126  | 0.43 | 1,38 | 0.022     | 0.081     | 0.334      | 1120        | tags=17%, list=9%, signal=18%  |
| 11 | HALLMARK_UV_RESPONSE_UP                    | 115  | 0.37 | 1,19 | 0.109     | 0.339     | 0.865      | 709         | tags=12%, list=6%, signal=13%  |
| 12 | HALLMARK_PEROXISOME                        | 79   | 0.40 | 1,17 | 0.164     | 0.345     | 0.891      | 2240        | tags=33%, list=18%, signal=40% |
| 13 | HALLMARK_KRAS_SIGNALING_UP                 | 140  | 0.34 | 1,11 | 0.212     | 0.483     | 0.970      | 2535        | tags=28%, list=20%, signal=35% |
| 14 | HALLMARK_INFLAMMATORY_RESPONSE             | 163  | 0.33 | 1,10 | 0.202     | 0.471     | 0.977      | 2200        | tags=21%, list=18%, signal=26% |
| 15 | HALLMARK_INTERFERON_GAMMA_RESPONSE         | 174  | 0.32 | 1,10 | 0.190     | 0.450     | 0.978      | 1924        | tags=24%, list=15%, signal=27% |
| 16 | HALLMARK_APOPTOSIS                         | 144  | 0.33 | 1,08 | 0.227     | 0.476     | 0.986      | 1654        | tags=18%, list=13%, signal=21% |
| 17 | HALLMARK_ADIPOGENESIS                      | 183  | 0.30 | 1,00 | 0.443     | 0.688     | 0.998      | 2613        | tags=32%, list=21%, signal=40% |
| 18 | HALLMARK_PI3K_AKT_MTOR_SIGNALING           | 92   | 0.33 | 0,98 | 0.485     | 0.726     | 0.999      | 1175        | tags=15%, list=9%, signal=17%  |
| 19 | HALLMARK_MTORC1_SIGNALING                  | 190  | 0.29 | 0,96 | 0.593     | 0.771     | 1.000      | 1253        | tags=12%, list=10%, signal=13% |
| 20 | HALLMARK_IL2_STAT5_SIGNALING               | 170  | 0.29 | 0,95 | 0.598     | 0.771     | 1.000      | 1134        | tags=12%, list=9%, signal=13%  |
| 21 | HALLMARK_MYOGENESIS                        | 128  | 0.28 | 0,92 | 0.717     | 0.848     | 1.000      | 1441        | tags=12%, list=12%, signal=13% |
| 22 | HALLMARK_MYC_TARGETS_V1                    | 195  | 0.27 | 0,91 | 0.743     | 0.827     | 1.000      | 1632        | tags=17%, list=13%, signal=19% |
| 23 | HALLMARK_IL6_JAK_STAT3_SIGNALING           | 76   | 0.30 | 0,89 | 0.653     | 0.851     | 1.000      | 1977        | tags=18%, list=16%, signal=22% |
| 24 | HALLMARK_P53_PATHWAY                       | 175  | 0.26 | 0,88 | 0.848     | 0.845     | 1.000      | 2720        | tags=23%, list=22%, signal=29% |
| 25 | HALLMARK_APICAL_JUNCTION                   | 130  | 0.26 | 0,83 | 0.917     | 0.944     | 1.000      | 2335        | tags=22%, list=19%, signal=27% |
| 26 | HALLMARK_HEDGEHOG_SIGNALING                | 24   | 0.34 | 0,80 | 0.764     | 0.943     | 1.000      | 832         | tags=13%, list=7%, signal=13%  |
| 27 | HALLMARK_NOTCH_SIGNALING                   | 26   | 0.33 | 0,79 | 0.799     | 0.919     | 1.000      | 762         | tags=8%, list=6%, signal=8%    |

**Table S3**

| NAME                               | SIZE | ES          | NES        | NOM p-val | FDR q-val   | logFDR  | FWER p-val | RANK AT MAX | LEADING EDGE                    |
|------------------------------------|------|-------------|------------|-----------|-------------|---------|------------|-------------|---------------------------------|
| GSE3982_NEUTROPHIL_VS_BASOPHIL_UP  | 127  | 0.18792799  | 2.4936059  | 0.0       | 0,002506787 | -2,6009 | 0.706      | 4141        | tags=54%, list=36%, signal=84%  |
| GSE27786_NEUTROPHIL_VS_MONO_MAC_UP | 147  | 0.17262954  | 2.4513268  | 0.0       | 0,00330879  | -2,4803 | 0.819      | 4488        | tags=56%, list=39%, signal=90%  |
| GSE22886_NEUTROPHIL_VS_MONOCYTE_DN | 186  | -0.21431348 | -3.4768302 | 0.0       | 0,0000001   | -7      | 0.0        | 3476        | tags=51%, list=30%, signal=72%  |
| GSE22886_NEUTROPHIL_VS_DC_DN       | 187  | -0.19650963 | -3.0743666 | 0.0       | 1,79E-05    | -4,7464 | 0.008      | 4701        | tags=60%, list=41%, signal=99%  |
| GSE27786_NEUTROPHIL_VS_MONO_MAC_DN | 163  | -0.13489847 | -2.0292807 | 0.0039525 | 0,02150858  | -1,6674 | 1.0        | 6351        | tags=68%, list=55%, signal=149% |
| GSE3982_NEUTROPHIL_VS_BASOPHIL_DN  | 164  | -0.13247892 | -1.9812163 | 0.0057361 | 0,027381597 | -1,5625 | 1.0        | 6260        | tags=67%, list=54%, signal=144% |

Table S4

| NAME                                       | SIZE | ES          | NES         | NOM p-val    | FDR q-val    | FWER p-val | RANK AT MAX | LEADING EDGE                   |
|--------------------------------------------|------|-------------|-------------|--------------|--------------|------------|-------------|--------------------------------|
| HALLMARK_ADIPOGENESIS                      | 185  | -0.33846906 | -1.3614275  | 0.013333334  | 0.28227615   | 1.0        | 4268        | tags=39%, list=21%, signal=49% |
| HALLMARK_COAGULATION                       | 100  | -0.33541805 | -1.2790787  | 0.052173913  | 0.34569374   | 1.0        | 1235        | tags=17%, list=6%, signal=18%  |
| HALLMARK_DNA_REPAIR                        | 137  | -0.34788033 | -1.3801625  | 0.014851485  | 0.26497552   | 1.0        | 5882        | tags=47%, list=29%, signal=66% |
| HALLMARK_E2F_TARGETS                       | 194  | -0.31480807 | -1.3173583  | 0.0062111802 | 0.3153329    | 1.0        | 3084        | tags=28%, list=15%, signal=33% |
| HALLMARK_FATTY_ACID_METABOLISM             | 135  | -0.4787959  | -1.9237534  | 0.0          | 0.004593605  | 0.644      | 3068        | tags=32%, list=15%, signal=37% |
| HALLMARK_GLYCOLYSIS                        | 179  | -0.26821175 | -1.0679168  | 0.270073     | 0.552309     | 1.0        | 3069        | tags=23%, list=15%, signal=27% |
| HALLMARK_HEME_METABOLISM                   | 182  | -0.4612496  | -1.8512348  | 0.0          | 0.011261245  | 0.962      | 3668        | tags=43%, list=18%, signal=52% |
| HALLMARK_MYC_TARGETS_V1                    | 191  | -0.5460221  | -2.215301   | 0.0          | 2.1171085E-5 | 0.002      | 4388        | tags=50%, list=21%, signal=63% |
| HALLMARK_MYC_TARGETS_V2                    | 56   | -0.2756289  | -0.93721586 | 0.5738832    | 0.7502626    | 1.0        | 5078        | tags=32%, list=25%, signal=43% |
| HALLMARK_OXIDATIVE_PHOSPHORYLATION         | 192  | -0.6128583  | -2.4825552  | 0.0          | 0.0          | 0.0        | 3337        | tags=48%, list=16%, signal=57% |
| HALLMARK_PANCREAS_BETA_CELLS               | 16   | -0.37138817 | -0.9443386  | 0.5298507    | 0.738289     | 1.0        | 3887        | tags=44%, list=19%, signal=54% |
| HALLMARK_PEROXISOME                        | 87   | -0.32129171 | -1.1875292  | 0.104417674  | 0.43081608   | 1.0        | 3737        | tags=25%, list=18%, signal=31% |
| HALLMARK_REACTIVE_OXIGEN_SPECIES_PATHWAY   | 45   | -0.3314567  | -1.0733126  | 0.3138686    | 0.5458442    | 1.0        | 1475        | tags=22%, list=7%, signal=24%  |
| HALLMARK_SPERMATOGENESIS                   | 95   | -0.3639183  | -1.3378547  | 0.034042552  | 0.30096272   | 1.0        | 2540        | tags=19%, list=12%, signal=22% |
| HALLMARK_XENOBIOTIC_METABOLISM             | 156  | -0.34734932 | -1.3840812  | 0.005319149  | 0.26299122   | 1.0        | 3148        | tags=27%, list=15%, signal=32% |
| HALLMARK_ALLOGRAFT_REJECTION               | 170  | 0.46404052  | 1.5719068   | 0.0023501762 | 0.052239303  | 1.0        | 2577        | tags=29%, list=13%, signal=33% |
| HALLMARK_ANDROGEN_RESPONSE                 | 89   | 0.39515847  | 1.2371061   | 0.12663186   | 0.27786115   | 1.0        | 4638        | tags=36%, list=23%, signal=46% |
| HALLMARK_ANGIOGENESIS                      | 30   | 0.4034587   | 1.0658443   | 0.3589365    | 0.5110081    | 1.0        | 1217        | tags=23%, list=6%, signal=25%  |
| HALLMARK_APICAL_JUNCTION                   | 154  | 0.3940256   | 1.3250257   | 0.032104637  | 0.19279501   | 1.0        | 3326        | tags=24%, list=16%, signal=28% |
| HALLMARK_APICAL_SURFACE                    | 34   | 0.39776358  | 1.0732794   | 0.35548687   | 0.50010306   | 1.0        | 3977        | tags=38%, list=19%, signal=47% |
| HALLMARK_APOPTOSIS                         | 142  | 0.37509593  | 1.2475381   | 0.0964591    | 0.26687083   | 1.0        | 3111        | tags=27%, list=15%, signal=32% |
| HALLMARK_BILE_ACID_METABOLISM              | 90   | 0.28031233  | 0.895026    | 0.65653896   | 0.7631104    | 1.0        | 3121        | tags=19%, list=15%, signal=22% |
| HALLMARK_CHOLESTEROL_HOMEOSTASIS           | 65   | 0.3066085   | 0.93213403  | 0.59172416   | 0.7101496    | 1.0        | 3408        | tags=23%, list=17%, signal=28% |
| HALLMARK_COMPLEMENT                        | 162  | 0.56313586  | 1.879213    | 0.0          | 0.0022028668 | 0.573      | 3401        | tags=38%, list=17%, signal=45% |
| HALLMARK_EPITHELIAL_MESENCHYMAL_TRANSITION | 162  | 0.33245185  | 1.1169387   | 0.24357405   | 0.43610907   | 1.0        | 2355        | tags=16%, list=11%, signal=18% |
| HALLMARK_ESTROGEN_RESPONSE_EARLY           | 165  | 0.3664692   | 1.245726    | 0.082825825  | 0.26891556   | 1.0        | 4005        | tags=28%, list=19%, signal=35% |
| HALLMARK_ESTROGEN_RESPONSE_LATE            | 158  | 0.3027445   | 1.0176535   | 0.41428572   | 0.58285004   | 1.0        | 2845        | tags=21%, list=14%, signal=24% |
| HALLMARK_G2M_CHECKPOINT                    | 190  | 0.31091806  | 1.0591061   | 0.3479769    | 0.52160436   | 1.0        | 4276        | tags=31%, list=21%, signal=39% |
| HALLMARK_HEDGEHOG_SIGNALING                | 28   | 0.570338    | 1.4751666   | 0.03598201   | 0.09293582   | 1.0        | 4459        | tags=57%, list=22%, signal=73% |
| HALLMARK_HYPOXIA                           | 172  | 0.4015272   | 1.3718623   | 0.020190023  | 0.1560477    | 1.0        | 3392        | tags=27%, list=16%, signal=32% |
| HALLMARK_IL2_STAT5_SIGNALING               | 186  | 0.39008537  | 1.3308102   | 0.036599763  | 0.18805379   | 1.0        | 3324        | tags=30%, list=16%, signal=36% |
| HALLMARK_IL6_JAK_STAT3_SIGNALING           | 76   | 0.62220806  | 1.9157144   | 0.0          | 0.0012145527 | 0.326      | 1563        | tags=38%, list=8%, signal=41%  |
| HALLMARK_INFLAMMATORY_RESPONSE             | 171  | 0.6786922   | 2.2992964   | 0.0          | 0.0          | 0.0        | 3358        | tags=50%, list=16%, signal=60% |
| HALLMARK_INTERFERON_ALPHA_RESPONSE         | 87   | 0.7168267   | 2.2577653   | 0.0          | 0.0          | 0.0        | 2231        | tags=44%, list=11%, signal=49% |
| HALLMARK_INTERFERON_GAMMA_RESPONSE         | 179  | 0.6370029   | 2.1780353   | 0.0          | 0.0          | 0.0        | 2577        | tags=41%, list=13%, signal=46% |

|                                     |     |            |           |              |              |       |      |                                |
|-------------------------------------|-----|------------|-----------|--------------|--------------|-------|------|--------------------------------|
| HALLMARK_KRAS_SIGNALING_DN          | 99  | 0.36303    | 1.153687  | 0.21501273   | 0.3836147    | 1.0   | 3617 | tags=26%, list=18%, signal=32% |
| HALLMARK_KRAS_SIGNALING_UP          | 156 | 0.3227955  | 1.0742397 | 0.32555282   | 0.49895805   | 1.0   | 3324 | tags=26%, list=16%, signal=30% |
| HALLMARK_MITOTIC_SPINDLE            | 197 | 0.5210862  | 1.8103101 | 0.0          | 0.0057318024 | 0.976 | 4044 | tags=38%, list=20%, signal=47% |
| HALLMARK_MTORC1_SIGNALING           | 194 | 0.29150614 | 1.0057975 | 0.4749709    | 0.60129726   | 1.0   | 3822 | tags=26%, list=19%, signal=32% |
| HALLMARK_MYOGENESIS                 | 148 | 0.23314323 | 0.780032  | 0.8951132    | 0.90023285   | 1.0   | 3399 | tags=20%, list=16%, signal=23% |
| HALLMARK_NOTCH_SIGNALING            | 30  | 0.41829374 | 1.1076216 | 0.33333334   | 0.4495052    | 1.0   | 2864 | tags=27%, list=14%, signal=31% |
| HALLMARK_P53_PATHWAY                | 185 | 0.39183876 | 1.3434826 | 0.025974026  | 0.17812084   | 1.0   | 2544 | tags=23%, list=12%, signal=26% |
| HALLMARK_PI3K_AKT_MTOR_SIGNALING    | 95  | 0.51282907 | 1.6282574 | 0.0025839794 | 0.035768677  | 1.0   | 2160 | tags=23%, list=10%, signal=26% |
| HALLMARK_PROTEIN_SECRETION          | 92  | 0.44095328 | 1.3757209 | 0.051587302  | 0.15286866   | 1.0   | 3282 | tags=26%, list=16%, signal=31% |
| HALLMARK_TGF_BETA_SIGNALING         | 50  | 0.37458792 | 1.0818352 | 0.33994335   | 0.48809466   | 1.0   | 3144 | tags=28%, list=15%, signal=33% |
| HALLMARK_TNFA_SIGNALING_VIA_NFKB    | 183 | 0.5215684  | 1.7845715 | 0.0          | 0.008045328  | 0.998 | 3144 | tags=36%, list=15%, signal=42% |
| HALLMARK_UNFOLDED_PROTEIN_RESPONSE  | 105 | 0.37609214 | 1.2050011 | 0.14133333   | 0.3157383    | 1.0   | 3372 | tags=24%, list=16%, signal=28% |
| HALLMARK_UV_RESPONSE_DN             | 131 | 0.4610755  | 1.5076544 | 0.0024271845 | 0.07844182   | 1.0   | 2046 | tags=22%, list=10%, signal=24% |
| HALLMARK_UV_RESPONSE_UP             | 132 | 0.32200328 | 1.0633616 | 0.33736396   | 0.51492196   | 1.0   | 4348 | tags=30%, list=21%, signal=37% |
| HALLMARK_WNT_BETA_CATENIN_SIGNALING | 37  | 0.42813328 | 1.170017  | 0.2392638    | 0.3607959    | 1.0   | 2198 | tags=22%, list=11%, signal=24% |

**Table S5**

## Oligonucleotides

|                   |                               |
|-------------------|-------------------------------|
| FW <i>Arf5</i>    | 5'-ATGCGGCTGGCAAGACTAC-3'     |
| RV <i>Arf5</i>    | 5'-ACAGAGGCCGAATCTTATCCT-3'   |
| FW <i>Selenop</i> | 5'-AGCTCTGCTTGTTACAAAGCC-3'   |
| RV <i>Selenop</i> | 5'-CAGGTCTTCCAATCTGGATGC-3'   |
| FW <i>C1qa</i>    | 5'-AAAGGCAATCCAGGCAATATCA-3'  |
| RV <i>C1qa</i>    | 5'-TGGTTCTGGTATGGACTCTCC-3'   |
| FW <i>Cxcl13</i>  | 5'-GGCCACGGTATTCTGGAAGC-3'    |
| RV <i>Cxcl13</i>  | 5'-GGGCGTAACTTGAATCCGATCTA-3' |
| FW <i>Mgl2</i>    | 5'-TTAGCCAATGTGCTTAGCTGG-3'   |
| RV <i>Mgl2</i>    | 5'-GGCCTCCAATTCTTGAAACCT-3'   |
| FW <i>Ms4a6d</i>  | 5'-TTCCATCCTGTTAGAATCTGGCT-3' |
| RV <i>Ms4a6d</i>  | 5'-GTGAACCAAAGGCTTAGTCATCT-3' |
| FW <i>Rbfa</i>    | 5'-GCCATCCAAGCATGAGTTCCT-3'   |
| RV <i>Rbfa</i>    | 5'-AGCAGTTCGTC AATGATTTGTA-3' |
| FW <i>H2-Ab1</i>  | 5'-TGAACAGCCCAATGTCGTCAT-3'   |
| RV <i>H2-Ab1</i>  | 5'-CAGCGCACTTTGATCTTGGC-3'    |
| FW <i>C1qc</i>    | 5'-AGAAGCACCAGTCGGTATTCA-3'   |
| RV <i>C1qc</i>    | 5'-TGCGATGTGTAGTAGACGAAGTA-3' |
| FW <i>Ykt6</i>    | 5'-AGTCAACTGATTGTGGAACGC-3'   |
| RV <i>Ykt6</i>    | 5'-TCTGGAAGGGTATTCGCTGTC-3'   |
| FW <i>Tmem14c</i> | 5'-CAGTGGCCCATTGATGCCTT-3'    |
| RV <i>Tmem14c</i> | 5'-GACGGCACACTACCTGCTT-3'     |
| FW <i>Gpx1</i>    | 5'-AGTCCACCGTGTATGCCTTCT-3'   |
| RV <i>Gpx1</i>    | 5'-GAGACGCGACATTCTCAATGA-3'   |
| FW <i>Emp3</i>    | 5'-TGGTGCTGTCTCTCATCCTCT-3'   |
| RV <i>Emp3</i>    | 5'-CGAAGCAGTAACCGAAGCTG-3'    |
| FW <i>Fermt3</i>  | 5'-ATGGCGGGTATGAAGACAGC-3'    |
| RV <i>Fermt3</i>  | 5'-CACCAATGTGCGACTCCCC-3'     |
| FW <i>Lyz2</i>    | 5'-ATGGAATGGCTGGCTACTATGG-3'  |
| RV <i>Lyz2</i>    | 5'-ACCAGTATCGGCTATTGATCTGA-3' |
| FW <i>Cmtm7</i>   | 5'-TCCAAGAGTTACAACCAGAGTGG-3' |
| RV <i>Cmtm7</i>   | 5'-CACAAGCTCGCTAGGCAGAG-3'    |
| FW <i>Vim</i>     | 5'-CGGCTGCGAGAGAAATTGC-3'     |
| RV <i>Vim</i>     | 5'-CCACTTTCCGTTCAAGGTCAAG-3'  |
| FW <i>Tecr</i>    | 5'-AAGCACTACGAGGTGGAGATT-3'   |
| RV <i>Tecr</i>    | 5'-TGAGGCTCTACCTTGTCCAGG-3'   |
| FW <i>Ap2a2</i>   | 5'-ACAGATACACGGAAAAGCAGATT-3' |
| RV <i>Ap2a2</i>   | 5'-ACCCATAAACGTAGGATTGCG-3'   |
| FW <i>Rps3</i>    | 5'-ATGGCGGTGCAGATTTCCAA-3'    |
| RV <i>Rps3</i>    | 5'-GTA ACTCGGACTTCAACTCCAG-3' |
